# Supplementary material
Source: publisher site journal article supplement (https://static.cambridge.org/content/id/urn:cambridge.org:id:article:S1074070823000214/resource/name/S1074070823000214supp001.pdf)
Supplement: Supplementary file 1 [file S1074070823000214supp001.pdf]

## 892 A Proofs of Propositions and Lemmas

893 **Lemma 1** *The optimal maximum age must be greater than or equal to the maximum*  
 894 *sustainable yield age, i.e.  $n^* \geq n_{MSY}$ .*

895 **Proof of Lemma 1.**

896 From our assumptions on the age-yield function in section 2.1.2, for all yields less  
 897 than the maximum yield, there are two ages that generate that yield. That is, for all  
 898  $\bar{y} \in (0, y(n_{MSY}))$ , there exist  $n_{\bar{y}}^- < n_{MSY} < n_{\bar{y}}^+$ , such that  $y(n_{\bar{y}}^-) = y(n_{\bar{y}}^+) = \bar{y}$ .

899 On the graph of the isoquant, these two  $n$  values generate the same area,  $\bar{L}$ , since  
 900  $L = \frac{\bar{Q}}{y(n)}$  so  $\frac{\bar{Q}}{y(n_{\bar{y}}^-)} = \frac{\bar{Q}}{y(n_{\bar{y}}^+)} = \bar{L}$ .

Now compare the costs of these two  $n$  values.

$$\begin{aligned} C(n_{\bar{y}}^-, \bar{L}) - C(n_{\bar{y}}^+, \bar{L}) &= \left(C_f + \frac{C_n}{n_{\bar{y}}^-}\right) \bar{L} + C_D y(n_{\bar{y}}^-) \bar{L}^{1.5} - \left(C_f + \frac{C_n}{n_{\bar{y}}^+}\right) \bar{L} - C_D y(n_{\bar{y}}^+) \bar{L}^{1.5} \\ &= \left(C_f + \frac{C_n}{n_{\bar{y}}^-}\right) \bar{L} + C_D \bar{y} \bar{L}^{1.5} - \left(C_f + \frac{C_n}{n_{\bar{y}}^+}\right) \bar{L} - C_D \bar{y} \bar{L}^{1.5} \\ &= C_n \bar{L} \left(\frac{1}{n_{\bar{y}}^-} - \frac{1}{n_{\bar{y}}^+}\right) (> 0) \end{aligned}$$

901 Hence for any level of yield, the cost minimizing maximum age is greater than or equal  
 902 to the maximum sustainable yield age, i.e.  $n^* \geq n_{MSY}$ . ■

903 **Lemma 2** *The minimum of the isoquant is located at  $n_{MSY}$ .*

**Proof of Lemma 2.**

The isoquant is defined by  $y(n)L = \bar{Q}$ . This can be rewritten so that  $L$  is a function of  $n$ , i.e. for a particular level of feedstock production  $L = \frac{\bar{Q}}{y(n)}$ . The minimum of this function (i.e. the least quantity of land necessary to produce the desired quantity)

occurs when the derivative of this function is set to zero.

$$\left. \frac{dL}{dn} \right|_{\text{isoquant}} = \frac{-\bar{Q}y'(n)}{[y(n)]^2} = 0 \Leftrightarrow y'(n) = 0$$

904 From the conditions imposed on the age-yield function in section 2.1.2 there is a unique  
 905 maximum of the yield function located at  $n_{MSY}$ . Hence the unique minimum of the  
 906 isoquant function occurs at  $n_{MSY}$ . ■

907 **Lemma 3** *The minimum of the isocost curve is located at  $n < n_{MSY}$ .*

908 **Proof of Lemma 3.**

909 The isocost curve is defined by a level set of the cost function:  $C(n, L) = \bar{C}$ . We  
 910 wish to locate the set of local extrema of the isocost curve, where  $L$  is expressed as a  
 911 function of  $n$ . This set is a subset of the critical points of  $\frac{dL}{dn}$ .

Totally differentiate the cost function:

$$\left[ \left( C_f + \frac{C_n}{n} \right) + 1.5 C_D y(n) L^{0.5} \right] dL + \left[ \frac{-C_n L}{n^2} + C_D y'(n) L^{1.5} \right] dn = 0$$

Thus

$$\left. \frac{dL}{dn} \right|_{\text{isocost}} = \frac{C_n L/n^2 - C_D y'(n) L^{1.5}}{\left( C_f + \frac{C_n}{n} \right) + 1.5 C_D y(n) L^{0.5}} = 0 \Leftrightarrow C_n L/n^2 = C_D y'(n) L^{1.5}$$

912 since all the terms in the denominator are non-negative. The only term in this last  
 913 equality that can change sign is  $y'(n)$ . All other terms are constrained to be non-  
 914 negative. Hence the equality cannot be satisfied if  $y'(n) < 0$ , which occurs when  
 915  $n > n_{MSY}$ . Also, if  $n = n_{MSY}$  it must be that  $L = 0$  for the equality to be satisfied.  
 916 If  $L = 0$  we have  $C(n_{MSY}, 0) = 0$ , so for any positive level of cost  $(n_{MSY}, 0)$  is not  
 917 an element of the graph of the isocost function, and  $n_{MSY}$  cannot be a critical point.

918 Hence for any positive level of cost, any extrema of the isocost function must occur  
 919 when  $n < n_{MSY}$ . ■

920 **Lemma 4** *The isocost curve has a positive slope for all  $n \geq n_{MSY}$ .*

921 **Proof of Lemma 4.**

922 This follows immediately from the proof of lemma 3 since the expression for the slope  
 923 of the isoquant curve is strictly positive for all  $n > n_{MSY}$ . ■

924

925 **Proof of proposition 1.**

926 *The optimal  $n$  must be strictly greater than  $n_{MSY}$ , i.e.  $n^* > n_{MSY}$ .*

927 The isocost curve has a positive slope for all  $n \geq n_{MSY}$  (lemma 4). The isoquant curve  
 928 has a zero slope at  $n_{MSY}$  (lemma 2). Hence the isocost and isoquant curves cannot be  
 929 tangential at  $n_{MSY}$ , so  $n^* \neq n_{MSY}$ . Combining this with lemma 1 gives us the result.  
 930 ■

931 **Lemma 5** *Assumptions (1)-(4) imply that  $0 < \lim_{n \rightarrow \infty} \int_0^n f(a) da < \infty$*

**Proof of Lemma 5.**

We can split  $\lim_{n \rightarrow \infty} \int_0^n f(a) da$  in two by partitioning its domain:

$$\begin{aligned} \lim_{n \rightarrow \infty} \int_0^n f(a) da &= \lim_{n \rightarrow \infty} \int_0^k f(a) da + \lim_{n \rightarrow \infty} \int_k^n f(a) da \\ &= \int_0^k f(a) da + \lim_{n \rightarrow \infty} \int_k^n f(a) da \end{aligned}$$

932 Now consider  $\int_0^k f(a) da$ . The age-yield function is bounded below by 0 by construction  
 933 ( $f(a)$  represents a physical quantity). Assumptions (1)-(3) imply that  $f(a)$  is bounded  
 934 above. Hence  $f(a)$  is bounded on the domain  $[0, k]$  for all  $k \in \mathbb{R}_{>0}$ . Thus  $0 \leq$   
 935  $\int_0^k f(a) da < \infty$  since this is the integral of a bounded positive function on a finite  
 936 domain.

We must consider two possibilities when analyzing  $\lim_{n \rightarrow \infty} \int_k^n f(a) da$ : either  $f(a) > 0$  for all  $a \in \mathbb{R}_{\geq 0}$ , or there exists some  $\hat{k} \in \mathbb{R}_{\geq 0}$  such that for all  $a > \hat{k}$   $f(a) = 0$ . In the first case, we must establish that  $\lim_{n \rightarrow \infty} f(a)$  approaches zero fast enough that  $\lim_{n \rightarrow \infty} \int_k^n f(a) da$  is not infinite. Assumption (4) implies that there exist  $k \in \mathbb{R}_{\geq 0}$  and  $p > 1$  such that for all  $a > k$   $f(a) < \frac{1}{a^p}$  (if such  $k$  and  $p$  did not exist,  $\lim_{n \rightarrow \infty} a f(a)$  would either be strictly positive, or infinite). Thus

$$\lim_{n \rightarrow \infty} \int_k^n f(a) da < \lim_{n \rightarrow \infty} \int_k^n \frac{1}{a^p} da < \infty$$

937 since integrals of the form  $\int_k^\infty \frac{1}{x^p} dx$  are convergent if and only if  $p > 1$ . In the  
 938 second case,  $\lim_{n \rightarrow \infty} \int_{\hat{k}}^n f(a) da = 0$ , and  $\lim_{n \rightarrow \infty} \int_0^n f(a) da = \int_0^{\hat{k}} f(a) da$ . Thus  
 939  $0 \leq \lim_{n \rightarrow \infty} \int_k^n f(a) da < \infty$

940 Assumption 3 implies that  $f(a)$  is strictly positive on some subset of  $\mathbb{R}_{\geq 0}$  with  
 941 non-empty interior. Hence  $\lim_{n \rightarrow \infty} \int_0^n f(a) da > 0$

942 Therefore  $0 < \lim_{n \rightarrow \infty} \int_0^n f(a) da < \infty$  ■

943

944 **Proof of proposition 2.**

945 *Given assumptions (1)-(4), a solution,  $n^*$ , to the cost minimization problem exists such*  
 946 *that  $n^* \in (n_{MSY}, \infty)$ .*

947 **Sketch of the proof:** We have already demonstrated that  $n^*$  must be greater than  
 948  $n_{MSY}$ . At  $n_{MSY}$  the slope of the isocost curve is strictly positive and the slope of the  
 949 isoquant curve is zero. We show that as  $n$  approaches infinity, the slope of the isocost  
 950 curve approaches zero, while the slope of the isoquant curve approaches a positive  
 951 value. By continuity the slope functions must cross at least once, and hence there  
 952 must exist at least one point where the isocost and isoquant curves are tangent to each  
 953 other.

We begin by showing that the slope of the isocost curve approaches zero as  $n$  approaches infinity. The slope of the isocost function when  $L$  is written as a function of  $n$  (as derived in lemma 2)

$$\left. \frac{dL}{dn} \right|_{\text{isocost}} = \frac{C_n L(n)/n^2 - C_D y'(n) L(n)^{1.5}}{(C_f + \frac{C_n}{n}) + 1.5 C_D y(n) L(n)^{0.5}}$$

To take the limit of this expression as  $n$  approaches infinity, we need to know how  $L(n)$  on the isocost function behaves as  $n$  approaches infinity. The isocost function is defined as

$$C(n, L) = (C_f + \frac{C_n}{n})L + C_D y(n) L^{1.5} = \bar{C}$$

This implicitly defines  $L$  as a function of  $n$ .

$$C(n) = (C_f + \frac{C_n}{n})L(n) + C_D y(n) L(n)^{1.5} = \bar{C}$$

Now we take the limit of this expression as  $n \rightarrow \infty$  and solve for the unknown value  $L_\infty$ .

$$\begin{aligned} \lim_{n \rightarrow \infty} (C_f + \frac{C_n}{n})L(n) + C_D y(n) L(n)^{1.5} &= \bar{C} \\ \Rightarrow C_f L_\infty &= \bar{C} \\ \Rightarrow L_\infty &= \frac{\bar{C}}{C_f} \quad \text{A constant} \end{aligned}$$

Returning to the derivative of the isocost function

$$\begin{aligned}
 \lim_{n \rightarrow \infty} \frac{dL}{dn} \Big|_{\text{isocost}} &= \lim_{n \rightarrow \infty} \frac{C_n L(n)/n^2 - C_D y'(n) L^{1.5}}{\left(C_f + \frac{C_n}{n}\right) + 1.5 C_D y(n) L(n)^{0.5}} \\
 &= \frac{0 - 0}{C_f + 0 + 0} && \text{Since } y(n) \text{ and } y'(n) \text{ both approach 0,} \\
 & && \text{and } L(n) \text{ approaches a constant as } n \rightarrow \infty \\
 &= 0
 \end{aligned}$$

Now we show that under a certain condition the slope of the isoquant function approaches a positive constant as  $n \rightarrow \infty$ . The isoquant function is given by  $y(n) L = \bar{Q}$  and can be rewritten as

$$\begin{aligned}
 L &= \frac{\bar{Q}}{\frac{1}{n} \int_0^n f(a) da} \\
 &= \frac{\bar{Q} n}{\int_0^n f(a) da}
 \end{aligned}$$

The slope of the isoquant function is given by

$$\frac{dL}{dn} \Big|_{\text{isoquant}} = \frac{\bar{Q} (\int_0^n f(a) da - n f(n))}{[\int_0^n f(a) da]^2}$$

The limit of the slope as  $n$  approaches infinity is

$$\begin{aligned}
\lim_{n \rightarrow \infty} \frac{dL}{dn} \Big|_{\text{isoquant}} &= \lim_{n \rightarrow \infty} \frac{\bar{Q} \left( \int_0^n f(a) da - n f(n) \right)}{\left[ \int_0^n f(a) da \right]^2} \\
&= \bar{Q} \frac{\lim_{n \rightarrow \infty} \left( \int_0^n f(a) da - n f(n) \right)}{\lim_{n \rightarrow \infty} \left[ \int_0^n f(a) da \right]^2} && \text{since } \lim_{n \rightarrow \infty} \int_0^n f(a) da > 0 \\
&&& \text{(Lemma 5)} \\
&&& \text{since} \\
&&& \lim_{n \rightarrow \infty} \int_0^n f(a) da \\
&&& > n f(n) = 0 \\
&&& \text{and} \\
&&& 0 < \lim_{n \rightarrow \infty} \int_0^n f(a) da < \infty \\
&&& \text{(Lemma 5)} \\
&&& \\
&\Rightarrow 0 < \lim_{n \rightarrow \infty} \frac{dL}{dn} \Big|_{\text{isoquant}} < \infty
\end{aligned}$$

954 Now define a function that returns the difference in the slopes of the isocost and  
955 isoquant functions,  $h(n) = \frac{dL}{dn} \Big|_{\text{isocost}} - \frac{dL}{dn} \Big|_{\text{isoquant}}$ . Since both constituent functions are  
956 continuous on the interval  $(n_{MSY}, \infty)$ ,  $h(n)$  is also continuous on this interval. At  
957 the maximum yield age  $h(n_{MSY}) > 0$  (from lemmas 2 and 4) and, as we have just  
958 shown, when  $n$  approaches infinity the limit of  $h(n)$  is strictly less than zero. Hence  
959 by the intermediate value theorem, there must exist some  $n^* \in (n_{MSY}, \infty)$  such that  
960  $h(n) = 0$ , and the isocost and isoquant curves are tangent to one another. ■

961

## 962 A.1 Proofs of comparative static results

**Proof of  $\frac{dn^*}{dQ} < 0$ .**

*As processing facility size increases, the optimal age decreases, i.e.  $\frac{dn^*}{dQ} < 0$ .*

Totally differentiating  $g(n, \bar{Q})$  (The derivative of the cost function when the constraint is used to eliminate  $L$  — derived in the proof of proposition 2) gives us an expression for the desired comparative static

$$\frac{dn^*}{d\bar{Q}} = \frac{-g_{\bar{Q}}}{g_n}$$

At an optimum the second order condition for a minimum must hold, so  $g_n$  must be positive. Hence

$$\text{sign}\left(\frac{dn^*}{d\bar{Q}}\right) = -\text{sign}(g_{\bar{Q}})$$

Differentiating  $g(n, \bar{Q})$  with respect to  $\bar{Q}$ , and evaluating at the optimum yields

$$g_{\bar{Q}} = -0.25 \underbrace{[y(n^*)]^{-1.5}}_{+} \underbrace{y'(n^*)}_{-} \underbrace{\bar{Q}^{-0.5}}_{+} \quad (> 0)$$

Hence

$$\frac{dn^*}{d\bar{Q}} < 0$$

963 ■

964

965

966 **Proof of  $y''(n^*) < 0 \Rightarrow \frac{dL^*}{dQ} > 0$ .**

967 *The change in optimal growing region size with respect to a change in processing facility*

968 *capacity is generally ambiguous, but if  $y''(n^*) < 0$ , then increased processing facility*

969 *capacity leads to increase growing region size, i.e.  $\frac{dL^*}{dQ} > 0$ .*

970



971 To analyze this comparative static of the constrained cost minimization problem  
 972 using the substitution method we need to define the inverse yield function,  $g(y) =$   
 973  $n$  ( $g^{-1}(n) = y(n)$ ). Since the yield function is not surjective, we can only define  
 974 and analyze the inverse yield on a subset of the domain. Fortunately, as shown by  
 975 proposition 1, the optimal  $n$  is found in the subset  $n > n_{MSY}$ . On this subset the yield  
 976 function is bijective, and we are guaranteed the existence of  $g(y)$ .

Using the constraint on processing facility capacity ( $y(n)L = \bar{Q} \Rightarrow y(n) = \frac{\bar{Q}}{L}$  and  
 $n = g\left(\frac{\bar{Q}}{L}\right)$ ) we can rewrite the cost function as a function of growing region only.

$$C(n(L), L) = \left( C_f + \frac{C_n}{g\left(\frac{\bar{Q}}{L}\right)} \right) L + C_D \bar{Q} L^{0.5}$$

The first order condition with respect to a minimum is

$$\frac{dC}{dL} = C_f + \frac{C_n}{g\left(\frac{\bar{Q}}{L}\right)} + \frac{\bar{Q} C_n g'\left(\frac{\bar{Q}}{L}\right)}{L \left[ g\left(\frac{\bar{Q}}{L}\right) \right]^2} + (0.5) C_D \bar{Q} L^{-0.5} = 0$$

Cross multiply by  $L \left[ g\left(\frac{\bar{Q}}{L}\right) \right]^2$

$$h(L) = C_f L \left[ g\left(\frac{\bar{Q}}{L}\right) \right]^2 + C_n L g\left(\frac{\bar{Q}}{L}\right) + C_n \bar{Q} g'\left(\frac{\bar{Q}}{L}\right) + (0.5) C_D \bar{Q} \left[ g\left(\frac{\bar{Q}}{L}\right) \right]^2 L^{0.5} = 0$$

Totally differentiating  $h(n, \bar{Q})$  gives us an expression for the desired comparative static

$$\frac{dL^*}{d\bar{Q}} = \frac{-h_{\bar{Q}}}{h_L}$$

At an optimum the second order condition for a minimum must hold, so  $g_n$  must be

positive. Hence

$$\text{sign} \left( \frac{dL^*}{d\bar{Q}} \right) = -\text{sign}(h_{\bar{Q}})$$

$$h_{\bar{Q}} = (0.5)C_D \left[ g \left( \frac{\bar{Q}}{L} \right) \right]^2 L^{0.5} \quad (>) \quad (16)$$

$$+ 2(0.5)C_D \bar{Q} g \left( \frac{\bar{Q}}{L} \right) g' \left( \frac{\bar{Q}}{L} \right) L^{-0.5} \quad (<) \quad (17)$$

$$+ 2C_f g \left( \frac{\bar{Q}}{L} \right) g' \left( \frac{\bar{Q}}{L} \right) \quad (<) \quad (18)$$

$$+ 2C_n g' \left( \frac{\bar{Q}}{L} \right) \quad (<) \quad (19)$$

$$+ \frac{C_n \bar{Q} g'' \left( \frac{\bar{Q}}{L} \right)}{L} \quad (\text{Ambiguous}) \quad (20)$$

977 If  $g'' \left( \frac{\bar{Q}}{L} \right) < 0$  at  $L^*$ , the term 20 in  $h_{\bar{Q}}$  is negative.

**Aside: Rewriting this condition in terms of  $y(n^*)$**

This condition on the second derivative of the inverse yield function is not particularly intuitive. We can rewrite this condition in terms of  $y(n^*)$  which makes it much easier to understand. To do this we must rewrite this condition on the second derivative of an inverse function in terms of the original function. The relationship between the second derivative of a function and its inverse is

$$(f^{-1})''(f(x)) = \frac{-f''(x)}{[f'(x)]^3}$$

For the inverse yield function this becomes

$$g'' \left( \frac{\bar{Q}}{L} \right) = g''(y(n^*)) = \frac{-y''(n^*)}{[y'(n^*)]^3}$$

So

$$g''\left(\frac{\bar{Q}}{L}\right) < 0 \Leftrightarrow \frac{-y''(n^*)}{[y'(n^*)]^3} < 0$$

978 Since  $y'(n^*) < 0$  and the cubing operation preserves sign, this inequality is satisfied if  
 979 and only if  $y''(n^*) < 0$ .

### Returning to the proof

Given that  $y''(n^*) < 0$ , we now show that term (16) plus term (17) is negative.

$$(16) + (17) = (0.5)C_D \left[ g\left(\frac{\bar{Q}}{L}\right) \right]^2 L^{0.5} + 2(0.5)C_D \bar{Q} g\left(\frac{\bar{Q}}{L}\right) g'\left(\frac{\bar{Q}}{L}\right) L^{-0.5}$$

Extract common factors

$$(16) + (17) = \underbrace{(0.5)C_D g\left(\frac{\bar{Q}}{L}\right) L^{0.5}}_{>0} \left[ g\left(\frac{\bar{Q}}{L}\right) + 2\bar{Q} g'\left(\frac{\bar{Q}}{L}\right) L^{-1} \right]$$

Therefore

$$\text{sign}((16) + (17)) = \text{sign}\left( g\left(\frac{\bar{Q}}{L}\right) + 2\bar{Q} g'\left(\frac{\bar{Q}}{L}\right) L^{-1} \right)$$

Substitute the definition of  $\bar{Q} = y(n) L$

$$\begin{aligned} & g\left(\frac{y(n) L}{L}\right) + 2y(n) L g'\left(\frac{y(n) L}{L}\right) L^{-1} \\ &= g(y(n)) + 2y(n) g'(y(n)) \\ &= n + \frac{2y(n)}{y'(n)} \end{aligned} \quad \text{since } g(\cdot) \text{ is inverse of } y(\cdot)$$

Recall  $y'(n) = \frac{f(n)-y(n)}{n}$ , so

$$\begin{aligned} n + \frac{2y(n)}{y'(n)} &= n + \frac{2ny(n)}{f(n) - y(n)} \\ &= n \left( 1 + \frac{2y(n)}{f(n) - y(n)} \right) \\ &= n \left( 1 - \frac{2y(n)}{y(n) - f(n)} \right) \end{aligned}$$

For  $n > n_{MSY}$ ,  $y(n) > f(n) \geq 0$ , hence  $\frac{2y(n)}{y(n)-f(n)} > 1$ , so (16) – (17)  $< 0$ ,  $h_{\bar{Q}} < 0$ , and  $\frac{dL^*}{d\bar{Q}} > 0$ . ■

### Proof of remaining comparative statics.

See table on page 20

As explained in the proofs the previous two comparative statics, the sign of the comparative static of  $n^*$  and  $L^*$  with respect to any exogenous variable  $x$  can be found by analyzing the sign of the relevant derivative of the first order condition, i.e.

$$\text{sign} \left( \frac{dn^*}{dx} \right) = -\text{sign}(g_x) \quad \text{and} \quad \text{sign} \left( \frac{dL^*}{dx} \right) = -\text{sign}(h_x)$$

We now present and sign the expressions of  $g_x$  for the parameters of interest.

$$g_{C_f} = -\frac{\bar{Q} \overbrace{y'(n^*)}}{y(n^*)^2} \quad (> 0)$$

$$g_{C_n^*} = \underbrace{\frac{-\bar{Q}}{n^* y(n^*)}}_{-} \underbrace{\left[ \frac{1}{n^*} + \frac{y'(n^*)}{y(n^*)} \right]}_{+} \quad (< 0) \quad \text{Since } \varepsilon_{y(n^*)} > -1 \Rightarrow \frac{1}{n^*} + \frac{y'(n^*)}{y(n^*)} > 0 \quad (\text{Prop 2})$$

$$g_{CD} = \underbrace{(-0.5)}_{-} \bar{Q}^{1.5} y(n^*)^{-1.5} \underbrace{y'(n^*)}_{-} \quad (> 0)$$

We now present and sign the expressions of  $h_x$  for the parameters of interest.

$$h_{C_f} = L(n^*)^2 \quad (> 0)$$

$$h_{C_n} = Ln^* + \frac{\bar{Q}}{y'(n^*)} \quad (< 0) \quad \text{Since } \varepsilon_{y(n^*)} > -1 \Rightarrow Ln^* + \frac{\bar{Q}}{y'(n^*)} < 0 \quad (\text{Prop 2})$$

$$h_{CD} = (0.5) (n^*)^2 \bar{Q} L^{0.5} \quad (> 0)$$

980 ■

## 981 B Calibration of the Cost-Minimization Problem

982 A piecewise linear spline function is used to estimate the age-yield function. With this  
 983 functional form, the cost minimization problem has 9 parameters for which values must  
 984 be found.

### 985 B.1 Brazilian Sugarcane

#### 986 B.1.1 Piece-wise Linear Age-Yield Function: $t_1, t_{max}, t_T, f_{max}$

987 The piece-wise linear age-yield function has four parameters. Parameter  $t_1$  designates  
 988 the age at which the yield first becomes positive,  $t_{max}$  is the age at which maximum  
 989 yield is achieved, and  $t_T$  is the age at which yield returns to zero. During the increasing  
 990 phase, between  $t_1$  and  $t_{max}$  the function is a positive affine and during the decreasing

991 phase, between  $t_{max}$  and  $t_T$ , the function is negative affine.

992 To estimate the parameters, we fit the linear-piecewise function to age-yield data  
 993 obtained from Margarido and Santos (2012). Figure 6 shows the original data and the  
 994 fitted age-yield function.

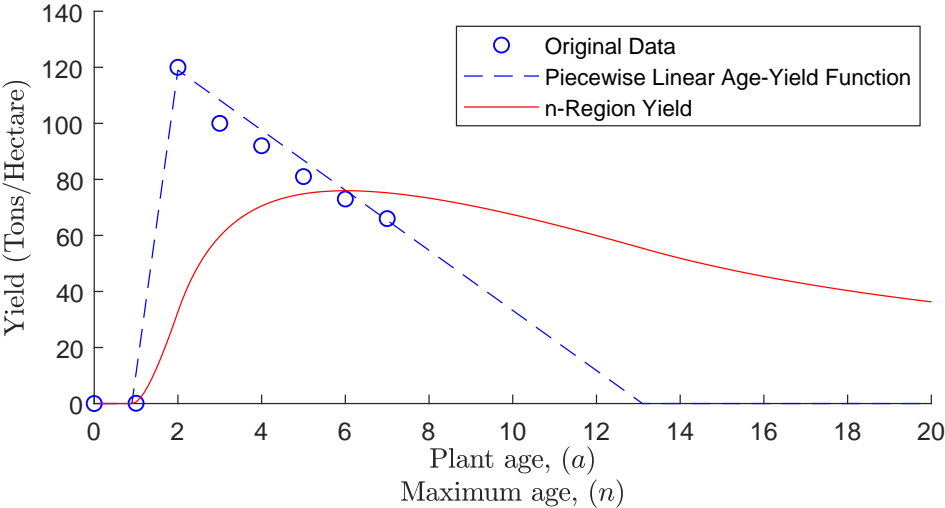

Figure 6: Fitting the piecewise-linear age-yield function to the Brazilian age-yield data from Margarido and Santos (2012).

995 The parameter values obtained are  $t_1 = 1$ ,  $t_{max} = 2$ ,  $t_T = 13$ , and  $f_{max} = 120$ .

996 **B.1.2 Farm-gate Cost parameters:  $C_f$ ,  $C_n$**

997 We derived the feedstock cost parameters,  $C_f$  and  $C_n$ , from Teixeira (2013), and the  
 998 delivery cost parameter,  $C_D$ , from Crago et al. (2010).

Teixeira (2013) presents an example operating budget for a 5-cut (6-age-class) sugarcane operation in São Paulo state, where they assume that 80 percent of the cane is harvested burned, and 20 percent is harvested raw. Costs are divided into five categories, delivery costs, and four that account for farm gate feedstock costs: preparing the

soil, planting, harvest, and maintenance of the ratoon. The total farm gate feedstock costs for a 6 hectare operation is given by

$$\begin{aligned} \text{Total Farm Gate} \\ \text{Feedstock Costs} &= \text{Soil Preparation} + \text{Planting} \\ &+ 5 \times \text{Harvest} + 4 \times \text{Ratoon maintenance} \end{aligned}$$

Since the total cost is given for 6 hectares, the total cost per hectare is

$$\begin{aligned} \text{Total Farm Gate} \\ \text{Feedstock Costs} \\ \text{(Per Hectare)} &= \frac{1}{6} \times \text{Soil Preparation} + \frac{1}{6} \times \text{Planting} \\ &+ \frac{5}{6} \times \text{Harvest} + \frac{4}{6} \times \text{Ratoon Maintenance} \end{aligned}$$

Assuming that these cost parameters are constant with respect to the number of age-classes we can write the total farm gate feedstock per hectare as a function of the age structure

$$\begin{aligned} \text{Farm gate} \\ \text{feedstock costs}(n) &= \frac{1}{n} \times \text{Soil Preparation} + \frac{1}{n} \times \text{Planting} \\ &+ \frac{n-1}{n} \times \text{Harvest} + \frac{n-2}{n} \times \text{Ratoon maintenance} \end{aligned}$$

Substituting Teixeira's numbers (in Reals) from the example budget, the cost function becomes

$$\text{Farm gate} \\ \text{feedstock costs}(n) = \frac{656.07}{n} + \frac{4159.83}{n} + \frac{n-1}{n} \times 1273.13 + \frac{n-2}{n} \times 986.54$$

Which on rearranging becomes

$$\text{Farm gate} \\ \text{feedstock costs}(n) = 2259.67 + \frac{1569.69}{n}$$

999 Hence for the simulations we use a baseline of  $C_f = 2259.67$  and  $C_n = 1569.69$ .

### 1000 **B.1.3 Delivery Cost parameter: $C_D$**

1001 While Teixeira (2013) does include estimates of delivery costs, he does not include the  
1002 processing facility size that this example farm is feeding. We therefore turn to Crago  
1003 et al. (2010) to derive the delivery cost parameter.

The total delivery cost from a growing region is given by

$$\begin{aligned} \text{Total Delivery Costs} &= \text{Average Cost Per Ton Kilometer} \\ &\quad \times \text{Quantity Transported} \\ &\quad \times \text{Average Delivery Distance} \end{aligned}$$

1004 Let  $\delta$  represent the average delivery cost per ton kilometer (i.e. the average cost to  
1005 transport one ton of feedstock one kilometer). Crago et al. (2010) report an average  
1006 transport cost of R\$6.7 to transport a ton of feedstock from the farm gate to the mill.  
1007 The average delivery distance in this study was 22 kilometers so in this case  $\delta = 0.3045$ .

1008 The average mill size in Crago et al. (2010) is 4.8 million tons. Given our assumption  
1009 that the growing region produces the exact quantity required to feed the mill, this  
1010 implied that the average quantity of feedstock transported was 4.8 million tons.

1011 When calculating the average delivery distance, we must make a distinction between  
1012 the area of land planted with sugarcane,  $L$ , and the area of the growing region,  $A$ .  
1013 Although we are assuming that the growing region is circular, it is not necessarily the  
1014 case that all the land is planted with sugarcane. In fact, relaxing the link between  
1015 planted area and growing region area is necessary to correctly calibrate the model to  
1016 the data in Crago et al. (2010).

Let  $d$  be the average density of sugarcane fields in the growing region, and  $A$  be



the area of the growing region. Hence

$$L = d \times A$$

The average delivery distance is given by the expression

$$r_{av} = \frac{2}{3}r_{max} = \frac{2}{3}\sqrt{\frac{A}{\pi}}$$

1017 Since the average delivery distance,  $r_{av}$ , from Crago et al. (2010) is 22km, the size of  
1018 the growing region is  $A = 342\,119$  ha.

We calculate the density parameter from

$$\text{Total Quantity} = \text{Yield} \times \text{Density} \times \text{Growing Region Area}$$

Crago et al. (2010) reports an average yield of 75 tons per hectare. So we calculate the density as

$$4800000 = 75 \times d \times 342119 \Rightarrow d = 0.187$$

Hence the expression for the total delivery cost becomes

$$\begin{aligned}
\text{Total Delivery Costs} &= \delta \times Q \times r_{av} \\
&= \delta \times Q \times \frac{2}{3} \sqrt{\frac{A}{\pi}} \\
&= \delta \times Q \times \frac{2}{3} \sqrt{\frac{L}{d \times \pi}} \\
&= \frac{2\delta}{3} \sqrt{\frac{1}{d \times \pi}} \times Q \times \sqrt{L} \\
&= \frac{2\delta}{3} \sqrt{\frac{1}{d \times \pi}} \times y(n)L\sqrt{L} \\
&= \frac{2\delta}{3} \sqrt{\frac{1}{d \times \pi}} \times y(n)L^{1.5} \\
&= C_D \times y(n)L^{1.5}
\end{aligned}$$

1019 For the  $d$  and  $\delta$  derived from Crago et al. (2010),  $C_D = 0.2649$ .

## 1020 B.2 Calibrated parameters and ranges used in simulations

|                 | Parameter | Min Value     | Calibration | Max Value      |
|-----------------|-----------|---------------|-------------|----------------|
| <b>Yield</b>    | $t_1$     | 0             | 1           | 2              |
|                 | $t_{max}$ | $t_1 + 1$     | 2           | $t_1 + 5$      |
|                 | $t_T$     | $t_{max} + 7$ | 13          | $t_{max} + 13$ |
|                 | $f_{max}$ | 60            | 120         | 180            |
| <b>Cost</b>     | $C_f$     | 1129.84       | 2259.67     | 3389.51        |
|                 | $C_n$     | 784.85        | 1569.69     | 2354.54        |
|                 | $C_D$     | 0.13          | 0.26        | 0.40           |
| <b>Capacity</b> | $\bar{Q}$ | 1 000 000     | 19 000 000  | 36 000 000     |

Table 3: Support for random parameters used in cost minimization. The parameters are drawn from a uniform distribution centered on the Brazilian calibration
